# Supplementary material
Source: PubMed Central journal article supplement (PMC5904312)
Supplement: rspb20172833supp1.pdf [file rspb20172833supp1.pdf]

Supplementary Information for

«Revealing hidden insect-fungus interactions; moderately specialized,  
modular and anti-nested detritivore networks»

by

Rannveig M. Jacobsen, Anne Sverdrup-Thygeson, Håvard Kauserud and

Tone Birkemoe

Table S1) Network data for all fungi annotated to species or genus isolated from wood-inhabiting beetles

| Species/genus              | Insects |
|----------------------------|---------|---------|---------|---------|---------|---------|---------|---------|---------|---------|---------|---------|---------|---------|---------|---------|---------|---------|
| Fungi                      | Acr.inf | Aga.nig | Aga.sp  | Ani.hum | Anb.sp  | Ant.sp  | Cis.bol | End.coc | Epu.sp  | Gli.hor | Gli.qua | Oxy.alt | Que.sp  | Rhi.sp  | Sep.lit | Try.dom | Xyl.lae |         |
| Alternaria_alternata       | 1       | 0       | 0       | 0       | 0       | 0       | 1       | 0       | 0       | 0       | 0       | 1       | 0       | 0       | 0       | 0       | 0       | 0       |
| Alternaria_infectoria      | 0       | 0       | 0       | 0       | 0       | 0       | 0       | 0       | 1       | 0       | 1       | 0       | 1       | 0       | 0       | 0       | 0       | 1       |
| Amylocystis_laponica       | 0       | 1       | 0       | 0       | 0       | 0       | 1       | 0       | 1       | 1       | 0       | 2       | 0       | 0       | 1       | 0       | 0       | 0       |
| Anguillospora_sp.          | 0       | 1       | 0       | 0       | 0       | 0       | 0       | 0       | 0       | 0       | 0       | 3       | 0       | 0       | 0       | 0       | 0       | 0       |
| Annulohypoxylon_multiforme | 0       | 0       | 0       | 0       | 0       | 0       | 0       | 0       | 0       | 0       | 0       | 0       | 0       | 0       | 0       | 1       | 0       | 0       |
| Antrodiella_parasitica     | 1       | 0       | 0       | 0       | 0       | 0       | 0       | 0       | 0       | 0       | 0       | 0       | 0       | 0       | 0       | 0       | 0       | 0       |
| Arachnopeziza_sp.          | 1       | 0       | 0       | 0       | 2       | 1       | 0       | 2       | 0       | 10      | 3       | 0       | 3       | 0       | 0       | 0       | 0       | 0       |
| Articulospora_atra         | 0       | 0       | 0       | 0       | 0       | 0       | 0       | 0       | 1       | 1       | 1       | 3       | 0       | 0       | 0       | 0       | 0       | 0       |
| Ascocoryne_sarcoides       | 0       | 0       | 0       | 0       | 1       | 0       | 0       | 0       | 4       | 0       | 0       | 0       | 0       | 1       | 0       | 0       | 1       | 0       |
| Aspergillus_tubingensis    | 0       | 0       | 0       | 0       | 0       | 0       | 0       | 0       | 0       | 0       | 0       | 0       | 0       | 0       | 0       | 0       | 0       | 1       |
| Aspergillus_westerdijkae   | 0       | 0       | 0       | 0       | 0       | 0       | 0       | 0       | 0       | 0       | 0       | 0       | 0       | 0       | 0       | 1       | 0       | 0       |
| Asterotremella_musci       | 0       | 0       | 0       | 0       | 0       | 0       | 0       | 0       | 0       | 0       | 4       | 0       | 0       | 0       | 2       | 0       | 0       | 0       |
| Aureobasidium_pullulans    | 1       | 1       | 0       | 0       | 0       | 0       | 0       | 0       | 1       | 0       | 3       | 2       | 0       | 1       | 0       | 0       | 0       | 1       |
| Basidiobolus_haptosporus   | 0       | 1       | 1       | 0       | 0       | 2       | 0       | 0       | 0       | 0       | 4       | 0       | 2       | 2       | 0       | 0       | 0       | 0       |
| Basidiobolus_ranarum       | 0       | 1       | 0       | 0       | 0       | 0       | 0       | 0       | 0       | 0       | 0       | 0       | 0       | 0       | 0       | 0       | 0       | 0       |
| Basidiobolus_sp.           | 0       | 0       | 1       | 0       | 0       | 1       | 0       | 0       | 0       | 0       | 0       | 0       | 0       | 0       | 0       | 0       | 0       | 0       |
| Beauveria_bassiana         | 0       | 0       | 0       | 0       | 0       | 0       | 0       | 0       | 1       | 1       | 2       | 0       | 0       | 2       | 0       | 0       | 0       | 0       |
| Bensingtonia_yamatoana     | 1       | 1       | 1       | 0       | 1       | 2       | 0       | 1       | 0       | 5       | 10      | 1       | 1       | 1       | 1       | 1       | 0       | 0       |
| Botryotinia_fuckeliana     | 0       | 0       | 0       | 0       | 1       | 1       | 0       | 4       | 1       | 2       | 1       | 0       | 1       | 0       | 0       | 0       | 0       | 1       |
| Bullera_sp.                | 0       | 0       | 0       | 0       | 0       | 0       | 0       | 0       | 0       | 0       | 0       | 1       | 0       | 0       | 0       | 0       | 0       | 0       |
| Cadophora_melinii          | 1       | 0       | 1       | 0       | 0       | 0       | 0       | 0       | 1       | 0       | 10      | 4       | 0       | 0       | 3       | 0       | 0       | 0       |
| Cadophora_sp.              | 0       | 0       | 0       | 0       | 0       | 0       | 1       | 0       | 0       | 0       | 15      | 7       | 0       | 0       | 6       | 0       | 0       | 1       |
| Calcarisporium_sp.         | 0       | 0       | 0       | 0       | 0       | 0       | 0       | 0       | 4       | 0       | 0       | 0       | 0       | 0       | 0       | 0       | 0       | 0       |
| Candida_fructus            | 0       | 0       | 0       | 0       | 0       | 0       | 0       | 0       | 0       | 0       | 1       | 3       | 0       | 0       | 0       | 0       | 0       | 0       |
| Candida_mesenterica        | 2       | 5       | 0       | 0       | 2       | 0       | 0       | 7       | 0       | 45      | 30      | 1       | 3       | 17      | 1       | 1       | 0       | 0       |
| Candida_sake               | 1       | 0       | 0       | 0       | 0       | 0       | 0       | 0       | 0       | 0       | 0       | 0       | 0       | 0       | 0       | 0       | 0       | 0       |
| Candida_schatavii          | 0       | 0       | 0       | 0       | 0       | 0       | 0       | 0       | 0       | 0       | 1       | 1       | 0       | 0       | 0       | 0       | 0       | 0       |
| Candida_sp.                | 0       | 7       | 1       | 0       | 4       | 5       | 0       | 8       | 5       | 48      | 30      | 1       | 3       | 23      | 2       | 0       | 1       | 0       |
| Candida_trypodendroni      | 0       | 0       | 0       | 0       | 0       | 0       | 0       | 0       | 0       | 0       | 1       | 3       | 0       | 0       | 0       | 0       | 1       | 0       |
| Capnobotryella_renispora   | 0       | 0       | 1       | 0       | 0       | 0       | 0       | 0       | 0       | 0       | 0       | 1       | 0       | 1       | 0       | 0       | 0       | 1       |
| Capnodium_sp.              | 0       | 0       | 0       | 0       | 0       | 0       | 0       | 0       | 1       | 0       | 0       | 2       | 0       | 0       | 0       | 0       | 0       | 0       |
| Capronia_pulcherrima       | 0       | 2       | 0       | 0       | 0       | 0       | 0       | 0       | 7       | 0       | 13      | 5       | 0       | 0       | 2       | 0       | 0       | 0       |
| Capronia_sp.               | 1       | 0       | 0       | 0       | 2       | 0       | 0       | 0       | 1       | 0       | 9       | 2       | 1       | 1       | 1       | 0       | 1       | 0       |
| Carcinomyces_polyporina    | 0       | 0       | 0       | 0       | 0       | 0       | 0       | 0       | 1       | 0       | 1       | 2       | 0       | 1       | 0       | 0       | 0       | 0       |
| Cephalotrichum_nanum       | 0       | 0       | 0       | 0       | 0       | 0       | 0       | 0       | 0       | 0       | 0       | 0       | 0       | 0       | 1       | 1       | 0       | 0       |
| Ceramothyrium_sp.          | 1       | 1       | 0       | 0       | 1       | 0       | 0       | 0       | 0       | 1       | 2       | 1       | 1       | 1       | 1       | 0       | 0       | 0       |
| Ceratocystiopsis_minuta    | 0       | 2       | 0       | 0       | 0       | 0       | 0       | 0       | 0       | 0       | 2       | 3       | 0       | 0       | 1       | 0       | 0       | 0       |
| Ceratocystis_paradoxa      | 0       | 0       | 0       | 0       | 0       | 0       | 0       | 0       | 0       | 1       | 0       | 0       | 0       | 1       | 0       | 0       | 0       | 0       |
| Chaenothecopsis_savonica   | 0       | 1       | 0       | 0       | 0       | 0       | 0       | 0       | 0       | 0       | 0       | 0       | 0       | 0       | 0       | 0       | 0       | 0       |
| Chaetosphaeria_sp.         | 0       | 0       | 0       | 0       | 0       | 0       | 1       | 0       | 0       | 0       | 2       | 0       | 0       | 0       | 0       | 0       | 0       | 0       |
| Chalara_hyalocuspica       | 0       | 2       | 0       | 0       | 1       | 0       | 0       | 4       | 1       | 11      | 5       | 0       | 0       | 4       | 0       | 1       | 0       | 0       |
| Chalara_microspora         | 0       | 0       | 0       | 0       | 1       | 1       | 0       | 1       | 0       | 2       | 0       | 0       | 0       | 1       | 0       | 0       | 0       | 1       |
| Chalara_piceae-abietis     | 0       | 2       | 1       | 0       | 2       | 1       | 0       | 9       | 1       | 37      | 11      | 1       | 6       | 1       | 2       | 0       | 2       | 0       |
| Chalara_pseudoaffinis      | 1       | 0       | 0       | 0       | 2       | 0       | 0       | 3       | 0       | 3       | 1       | 0       | 1       | 0       | 1       | 0       | 1       | 0       |
| Chalara_sp.                | 0       | 1       | 0       | 0       | 1       | 2       | 0       | 11      | 2       | 30      | 12      | 0       | 4       | 4       | 1       | 0       | 2       | 0       |
| Chondrostereum_purpureum   | 2       | 8       | 3       | 0       | 3       | 1       | 0       | 15      | 0       | 16      | 21      | 0       | 1       | 7       | 2       | 0       | 2       | 0       |
| Chytridiomycota_sp.        | 0       | 0       | 0       | 0       | 0       | 1       | 0       | 1       | 0       | 0       | 5       | 2       | 0       | 0       | 1       | 0       | 0       | 0       |





| Species/genus               | Insects |
|-----------------------------|---------|---------|---------|---------|---------|---------|---------|---------|---------|---------|---------|---------|---------|---------|---------|---------|---------|
| Fungi                       | Acr.inf | Aga.nig | Aga.sp  | Ani.hum | Anb.sp  | Ant.sp  | Cis.bol | End.coc | Epu.sp  | Gli.hor | Gli.qua | Oxy.alt | Que.sp  | Rhi.sp  | Sep.lit | Try.dom | Xyl.lae |
| Lirula_yunnanensis          | 0       | 0       | 0       | 0       | 0       | 0       | 0       | 0       | 2       | 1       | 6       | 0       | 0       | 3       | 0       | 0       | 0       |
| Lophiostoma_corticola       | 0       | 1       | 0       | 0       | 0       | 0       | 0       | 0       | 0       | 0       | 0       | 0       | 0       | 0       | 1       | 0       | 1       |
| Lophiostoma_sp.             | 0       | 0       | 0       | 0       | 0       | 0       | 0       | 0       | 2       | 0       | 3       | 0       | 0       | 0       | 0       | 0       | 0       |
| Lophium_mytilinum           | 0       | 0       | 0       | 0       | 0       | 0       | 0       | 0       | 1       | 0       | 2       | 1       | 0       | 0       | 1       | 0       | 0       |
| Lophodermium_conigenum      | 1       | 0       | 0       | 0       | 0       | 0       | 0       | 0       | 0       | 0       | 0       | 0       | 0       | 0       | 0       | 0       | 0       |
| Lophodermium_piceae         | 4       | 1       | 1       | 0       | 5       | 1       | 0       | 13      | 3       | 35      | 22      | 1       | 5       | 10      | 2       | 0       | 3       |
| Malassezia_equina           | 0       | 0       | 1       | 0       | 0       | 0       | 1       | 0       | 0       | 0       | 0       | 0       | 0       | 0       | 0       | 0       | 0       |
| Malassezia_restricta        | 2       | 4       | 4       | 0       | 1       | 0       | 1       | 3       | 1       | 4       | 3       | 1       | 0       | 4       | 2       | 0       | 1       |
| Malassezia_symptodialis     | 0       | 1       | 0       | 0       | 0       | 0       | 0       | 0       | 0       | 0       | 0       | 0       | 0       | 0       | 0       | 0       | 1       |
| Massarina_sp.               | 0       | 0       | 0       | 0       | 0       | 0       | 0       | 4       | 0       | 4       | 2       | 1       | 0       | 0       | 0       | 0       | 0       |
| Mastigobasidium_intermedium | 0       | 7       | 1       | 1       | 5       | 5       | 0       | 14      | 2       | 45      | 31      | 0       | 4       | 20      | 2       | 0       | 1       |
| Meliniomyces_variabilis     | 0       | 1       | 0       | 0       | 0       | 0       | 0       | 0       | 0       | 1       | 0       | 0       | 0       | 0       | 0       | 0       | 0       |
| Meliniomyces_vraolstadae    | 0       | 0       | 0       | 0       | 0       | 0       | 0       | 0       | 0       | 1       | 0       | 0       | 0       | 0       | 0       | 0       | 0       |
| Micarea_sp.                 | 1       | 0       | 0       | 0       | 0       | 0       | 0       | 0       | 0       | 0       | 0       | 0       | 0       | 0       | 0       | 0       | 0       |
| Microsphaeropsis_olivacea   | 0       | 0       | 1       | 0       | 1       | 1       | 0       | 2       | 2       | 6       | 5       | 0       | 1       | 0       | 0       | 0       | 2       |
| Microstroma_bacarum         | 0       | 0       | 0       | 0       | 0       | 0       | 0       | 0       | 1       | 0       | 0       | 0       | 0       | 0       | 0       | 0       | 0       |
| Minimelanolocus_obscurus    | 0       | 0       | 0       | 0       | 0       | 0       | 0       | 3       | 0       | 1       | 0       | 0       | 0       | 0       | 0       | 0       | 0       |
| Mollisia_sp.                | 0       | 0       | 0       | 0       | 1       | 1       | 0       | 1       | 0       | 0       | 0       | 0       | 0       | 0       | 0       | 0       | 0       |
| Monilinia_sp.               | 0       | 0       | 0       | 0       | 0       | 0       | 0       | 0       | 0       | 0       | 0       | 0       | 0       | 1       | 0       | 0       | 0       |
| Mortierella_amoeboidea      | 0       | 0       | 0       | 0       | 0       | 0       | 0       | 0       | 0       | 2       | 0       | 0       | 0       | 0       | 0       | 0       | 1       |
| Mortierella_macrozystis     | 0       | 0       | 0       | 0       | 0       | 0       | 0       | 0       | 1       | 0       | 0       | 0       | 0       | 0       | 0       | 0       | 0       |
| Mortierella_minutissima     | 0       | 0       | 1       | 0       | 0       | 0       | 0       | 1       | 0       | 2       | 0       | 0       | 0       | 0       | 0       | 0       | 0       |
| Mortierella_parvispora      | 0       | 0       | 0       | 0       | 0       | 2       | 0       | 2       | 1       | 3       | 1       | 0       | 1       | 0       | 0       | 0       | 0       |
| Mortierella_pulchella       | 0       | 0       | 0       | 0       | 0       | 3       | 0       | 0       | 0       | 1       | 0       | 0       | 2       | 0       | 0       | 0       | 0       |
| Mortierella_sp.             | 0       | 0       | 0       | 0       | 0       | 0       | 0       | 0       | 0       | 0       | 0       | 0       | 0       | 1       | 0       | 0       | 0       |
| Mortierella_zychae          | 0       | 1       | 0       | 0       | 0       | 0       | 0       | 2       | 0       | 0       | 1       | 0       | 0       | 0       | 0       | 0       | 0       |
| Mrakia_frigida              | 0       | 3       | 0       | 0       | 0       | 2       | 0       | 2       | 0       | 32      | 17      | 0       | 1       | 12      | 2       | 0       | 0       |
| Mucor_genevensis            | 0       | 0       | 0       | 0       | 0       | 0       | 0       | 2       | 0       | 0       | 0       | 0       | 0       | 0       | 0       | 0       | 0       |
| Mucor_hiemalis              | 0       | 0       | 0       | 0       | 1       | 1       | 0       | 9       | 1       | 1       | 0       | 1       | 0       | 1       | 0       | 0       | 0       |
| Mucor_luteus                | 0       | 0       | 0       | 0       | 1       | 0       | 0       | 1       | 0       | 0       | 0       | 0       | 0       | 0       | 0       | 0       | 0       |
| Mycena_rubromarginata       | 0       | 0       | 0       | 0       | 0       | 0       | 0       | 1       | 0       | 2       | 0       | 0       | 0       | 0       | 0       | 0       | 0       |
| Mycocentrospora_acerina     | 0       | 0       | 0       | 0       | 0       | 0       | 0       | 1       | 0       | 0       | 0       | 0       | 0       | 0       | 0       | 0       | 0       |
| Mycosphaerella_grossulariae | 0       | 0       | 1       | 0       | 1       | 2       | 0       | 1       | 0       | 0       | 1       | 0       | 0       | 0       | 0       | 0       | 0       |
| Myrmecridium_sp.            | 0       | 0       | 0       | 0       | 0       | 0       | 0       | 0       | 0       | 0       | 0       | 1       | 0       | 0       | 0       | 0       | 0       |
| Naematelia_aurantialba      | 0       | 0       | 0       | 0       | 0       | 1       | 0       | 0       | 0       | 2       | 0       | 0       | 0       | 0       | 0       | 0       | 0       |
| Naganishia_adeliensis       | 0       | 0       | 1       | 0       | 0       | 1       | 0       | 1       | 0       | 1       | 4       | 1       | 0       | 2       | 1       | 0       | 0       |
| Nakazawaea_anatomiae        | 0       | 1       | 0       | 0       | 1       | 1       | 0       | 0       | 0       | 20      | 8       | 0       | 1       | 8       | 0       | 0       | 0       |
| Nakazawaea_populi           | 0       | 1       | 0       | 0       | 1       | 2       | 0       | 1       | 0       | 26      | 17      | 0       | 1       | 9       | 0       | 0       | 0       |
| Neonectria_fuckeliana       | 0       | 0       | 0       | 0       | 1       | 0       | 0       | 0       | 0       | 0       | 2       | 0       | 0       | 0       | 0       | 0       | 0       |
| Neonectria_obtusispora      | 0       | 1       | 1       | 0       | 0       | 0       | 0       | 3       | 0       | 8       | 7       | 0       | 0       | 1       | 0       | 0       | 0       |
| Neonectria_punicea          | 0       | 0       | 0       | 0       | 0       | 0       | 0       | 1       | 0       | 1       | 2       | 0       | 0       | 0       | 0       | 0       | 0       |
| Neonectria_sp.              | 0       | 2       | 1       | 0       | 0       | 0       | 0       | 4       | 0       | 7       | 4       | 0       | 0       | 2       | 0       | 0       | 0       |
| Neosetophoma_samarorum      | 0       | 0       | 0       | 0       | 0       | 0       | 0       | 4       | 0       | 4       | 3       | 0       | 0       | 0       | 0       | 0       | 0       |
| Oidiodendron_sp.            | 0       | 0       | 0       | 0       | 1       | 2       | 0       | 0       | 0       | 0       | 0       | 0       | 2       | 1       | 0       | 0       | 0       |
| Oidiodendron_tenuissimum    | 0       | 0       | 0       | 0       | 0       | 2       | 0       | 3       | 0       | 0       | 1       | 0       | 0       | 0       | 0       | 0       | 1       |
| Ophiostoma_canum            | 0       | 2       | 0       | 0       | 0       | 0       | 0       | 0       | 2       | 3       | 15      | 1       | 2       | 3       | 1       | 0       | 0       |
| Ophiostoma_karelicum        | 0       | 0       | 0       | 0       | 0       | 0       | 0       | 0       | 2       | 1       | 2       | 0       | 0       | 0       | 0       | 0       | 0       |
| Ophiostoma_piceae           | 0       | 0       | 0       | 0       | 0       | 0       | 0       | 0       | 1       | 0       | 2       | 0       | 1       | 1       | 0       | 0       | 0       |

| Species/genus                | Insects |
|------------------------------|---------|---------|---------|---------|---------|---------|---------|---------|---------|---------|---------|---------|---------|---------|---------|---------|---------|
| Fungi                        | Acr.inf | Aga.nig | Aga.sp  | Ani.hum | Anb.sp  | Ant.sp  | Cis.bol | End.coc | Epu.sp  | Gli.hor | Gli.qua | Oxy.alt | Que.sp  | Rhi.sp  | Sep.lit | Try.dom | Xyl.lae |
| Ophiostoma_quercus           | 0       | 0       | 0       | 0       | 0       | 0       | 0       | 0       | 0       | 1       | 0       | 0       | 0       | 0       | 0       | 0       | 0       |
| Ophiostoma_tetropii          | 0       | 0       | 0       | 0       | 0       | 0       | 0       | 0       | 0       | 0       | 0       | 4       | 0       | 1       | 0       | 0       | 0       |
| Paraphoma_sp.                | 0       | 0       | 0       | 0       | 0       | 0       | 0       | 0       | 3       | 0       | 4       | 0       | 0       | 0       | 0       | 0       | 0       |
| Parascedosporium_putredinis  | 0       | 1       | 0       | 0       | 0       | 0       | 0       | 0       | 0       | 0       | 0       | 0       | 0       | 0       | 0       | 0       | 0       |
| Penicillium_brevicomactum    | 0       | 0       | 0       | 0       | 0       | 0       | 0       | 0       | 2       | 2       | 0       | 1       | 0       | 1       | 0       | 0       | 0       |
| Penicillium_raistrickii      | 0       | 0       | 0       | 0       | 0       | 0       | 1       | 0       | 6       | 1       | 2       | 3       | 0       | 0       | 0       | 0       | 2       |
| Periconia_sp.                | 0       | 0       | 0       | 0       | 0       | 0       | 0       | 0       | 0       | 1       | 1       | 1       | 0       | 0       | 0       | 2       | 0       |
| Peterozyma_toletana          | 1       | 2       | 0       | 0       | 0       | 0       | 1       | 0       | 0       | 0       | 17      | 23      | 0       | 1       | 3       | 1       | 0       |
| Pezicula_melanigena          | 0       | 0       | 0       | 0       | 0       | 0       | 0       | 0       | 1       | 0       | 0       | 0       | 0       | 0       | 0       | 0       | 0       |
| Phacidium_lacerum            | 0       | 0       | 0       | 0       | 0       | 0       | 0       | 0       | 2       | 0       | 5       | 7       | 0       | 0       | 2       | 0       | 1       |
| Phaeocryptopus_gaeumannii    | 0       | 0       | 0       | 0       | 0       | 0       | 1       | 0       | 0       | 0       | 0       | 1       | 1       | 0       | 0       | 0       | 0       |
| Phaeosphaeria_pontiformis    | 0       | 0       | 0       | 0       | 0       | 0       | 1       | 0       | 1       | 0       | 2       | 1       | 0       | 0       | 0       | 0       | 0       |
| Phaeotremella_pseudofoliacea | 0       | 0       | 0       | 0       | 0       | 1       | 0       | 0       | 0       | 0       | 3       | 0       | 0       | 0       | 0       | 0       | 1       |
| Phialea_strobilina           | 0       | 1       | 0       | 0       | 0       | 0       | 0       | 0       | 1       | 0       | 0       | 0       | 0       | 0       | 0       | 0       | 0       |
| Phialemoniopsis_sp.          | 0       | 1       | 0       | 0       | 0       | 0       | 0       | 0       | 0       | 0       | 0       | 0       | 0       | 0       | 0       | 0       | 0       |
| Phialocephala_humicola       | 0       | 0       | 0       | 0       | 0       | 0       | 0       | 0       | 0       | 1       | 0       | 0       | 0       | 0       | 0       | 0       | 0       |
| Phialocephala_sp.            | 0       | 0       | 0       | 0       | 0       | 0       | 0       | 0       | 1       | 1       | 2       | 0       | 0       | 0       | 0       | 0       | 0       |
| Phialophora_atrovirens       | 0       | 0       | 0       | 0       | 0       | 2       | 1       | 0       | 1       | 0       | 10      | 10      | 1       | 1       | 4       | 0       | 0       |
| Phialophora_bubakii          | 3       | 9       | 3       | 1       | 4       | 3       | 3       | 0       | 16      | 2       | 48      | 31      | 2       | 5       | 22      | 2       | 0       |
| Phialophora_sessilis         | 1       | 0       | 0       | 0       | 0       | 2       | 1       | 0       | 3       | 2       | 8       | 2       | 2       | 1       | 0       | 1       | 0       |
| Phialophora_sp.              | 0       | 0       | 1       | 0       | 0       | 0       | 0       | 0       | 0       | 0       | 24      | 17      | 1       | 1       | 7       | 0       | 0       |
| Phialophoropsis_ferruginea   | 0       | 0       | 0       | 0       | 0       | 0       | 0       | 0       | 0       | 1       | 1       | 3       | 0       | 0       | 0       | 1       | 1       |
| Phlebia_centrifuga           | 0       | 0       | 1       | 0       | 0       | 0       | 0       | 0       | 2       | 0       | 2       | 1       | 0       | 0       | 2       | 0       | 0       |
| Piloderma_sp.                | 0       | 0       | 0       | 0       | 0       | 0       | 1       | 0       | 5       | 0       | 1       | 0       | 0       | 0       | 0       | 0       | 0       |
| Piskurozyma_cylindrica       | 0       | 0       | 1       | 0       | 0       | 0       | 0       | 0       | 1       | 0       | 5       | 8       | 0       | 0       | 1       | 1       | 0       |
| Placynthiella_icmalea        | 0       | 0       | 0       | 0       | 0       | 0       | 0       | 0       | 0       | 0       | 0       | 1       | 0       | 0       | 0       | 0       | 0       |
| Platismatia_glauca           | 0       | 0       | 0       | 0       | 0       | 0       | 0       | 0       | 0       | 0       | 0       | 3       | 0       | 0       | 1       | 0       | 0       |
| Podosphaera_clandestina      | 1       | 0       | 1       | 0       | 0       | 1       | 0       | 0       | 0       | 0       | 0       | 0       | 0       | 0       | 1       | 0       | 0       |
| Podosphaera_sp.              | 1       | 0       | 1       | 0       | 0       | 1       | 0       | 0       | 0       | 0       | 0       | 0       | 0       | 0       | 0       | 0       | 0       |
| Polyscytalum_sp.             | 1       | 1       | 0       | 0       | 0       | 1       | 1       | 0       | 0       | 0       | 2       | 1       | 0       | 1       | 0       | 0       | 1       |
| Powellomyces_sp.             | 0       | 0       | 0       | 0       | 0       | 0       | 1       | 0       | 2       | 1       | 6       | 3       | 0       | 0       | 2       | 0       | 0       |
| Protomyces_sp.               | 3       | 2       | 1       | 1       | 2       | 3       | 3       | 0       | 1       | 0       | 15      | 2       | 1       | 1       | 2       | 0       | 3       |
| Pseudocercospora_fraxini     | 1       | 0       | 0       | 0       | 0       | 0       | 2       | 0       | 4       | 1       | 7       | 3       | 0       | 3       | 1       | 0       | 2       |
| Pseudochaete_intricata       | 0       | 0       | 0       | 0       | 0       | 0       | 0       | 0       | 1       | 0       | 0       | 0       | 0       | 0       | 0       | 0       | 0       |
| Pseudogymnoascus_sp.         | 0       | 0       | 0       | 0       | 0       | 1       | 0       | 0       | 2       | 1       | 5       | 3       | 0       | 2       | 1       | 2       | 1       |
| Pseudopenidiella_piceae      | 0       | 0       | 0       | 0       | 0       | 0       | 1       | 0       | 2       | 0       | 2       | 1       | 0       | 0       | 0       | 0       | 0       |
| Pseudopenidiella_sp.         | 0       | 0       | 0       | 0       | 0       | 0       | 0       | 0       | 0       | 0       | 0       | 0       | 0       | 1       | 0       | 0       | 0       |
| Pseudopithomyces_chartarum   | 0       | 0       | 0       | 0       | 0       | 0       | 0       | 0       | 0       | 0       | 0       | 0       | 1       | 0       | 0       | 0       | 0       |
| Pycnopulvinus_aurantiacus    | 0       | 0       | 0       | 0       | 0       | 0       | 0       | 0       | 0       | 3       | 0       | 0       | 0       | 0       | 0       | 0       | 0       |
| Pycnopulvinus_sp.            | 0       | 0       | 0       | 0       | 0       | 0       | 0       | 0       | 0       | 3       | 0       | 0       | 0       | 0       | 0       | 0       | 0       |
| Pyrenochaeta_sp.             | 0       | 0       | 0       | 0       | 0       | 0       | 0       | 0       | 0       | 0       | 2       | 0       | 0       | 0       | 0       | 0       | 0       |
| Ramichloridium_pini          | 0       | 0       | 0       | 0       | 0       | 0       | 0       | 0       | 0       | 0       | 0       | 0       | 0       | 0       | 0       | 0       | 1       |
| Ramularia_stellenboschensis  | 0       | 0       | 0       | 0       | 0       | 0       | 1       | 0       | 1       | 0       | 4       | 2       | 0       | 2       | 1       | 0       | 3       |
| Resinicium_bicolor           | 0       | 0       | 0       | 0       | 0       | 0       | 1       | 0       | 1       | 0       | 1       | 0       | 0       | 0       | 0       | 0       | 0       |
| Rhinochlaeniella_sp.         | 2       | 3       | 0       | 0       | 0       | 4       | 0       | 0       | 2       | 0       | 22      | 16      | 0       | 2       | 6       | 1       | 2       |
| Rhizosphaera_kalkhoffii      | 1       | 1       | 0       | 0       | 0       | 2       | 4       | 0       | 5       | 2       | 15      | 9       | 0       | 1       | 3       | 0       | 3       |
| Rhizosphaera_sp.             | 0       | 1       | 1       | 0       | 0       | 2       | 1       | 0       | 3       | 0       | 35      | 26      | 0       | 3       | 12      | 2       | 0       |
| Rhodotorula_colostri         | 1       | 0       | 2       | 0       | 0       | 3       | 2       | 0       | 1       | 1       | 6       | 5       | 2       | 2       | 0       | 0       | 2       |

| Species/genus                     | Insects |   |
|-----------------------------------|---------|---------|---------|---------|---------|---------|---------|---------|---------|---------|---------|---------|---------|---------|---------|---------|---------|---|
| Fungi                             | Acr.inf | Aga.nig | Aga.sp  | Ani.hum | Anb.sp  | Ant.sp  | Cis.bol | End.coc | Epu.sp  | Gli.hor | Gli.qua | Oxy.alt | Que.sp  | Rhi.sp  | Sep.lit | Try.dom | Xyl.lae |   |
| Rhodotorula_glacialis             | 0       | 0       | 0       | 0       | 0       | 0       | 2       | 0       | 0       | 0       | 8       | 11      | 0       | 1       | 5       | 2       | 0       | 0 |
| Rhodotorula_lignophila            | 0       | 0       | 0       | 0       | 0       | 1       | 0       | 0       | 0       | 0       | 0       | 0       | 0       | 0       | 1       | 0       | 0       | 0 |
| Rhodotorula_mucilaginosa_var._muc | 1       | 0       | 0       | 0       | 0       | 0       | 0       | 0       | 0       | 0       | 0       | 0       | 0       | 0       | 0       | 0       | 0       | 0 |
| Rhodotorula_pilati                | 0       | 0       | 0       | 0       | 0       | 1       | 1       | 0       | 0       | 0       | 2       | 0       | 0       | 0       | 0       | 0       | 0       | 0 |
| Rhodotorula_silvestris            | 0       | 0       | 0       | 0       | 0       | 1       | 1       | 0       | 0       | 1       | 1       | 2       | 0       | 0       | 0       | 0       | 0       | 0 |
| Rhodotorula_sp.                   | 0       | 0       | 0       | 0       | 0       | 2       | 1       | 0       | 1       | 0       | 15      | 7       | 1       | 0       | 2       | 0       | 0       | 0 |
| Rhodotorula_yarrowii              | 0       | 0       | 0       | 0       | 0       | 1       | 1       | 0       | 1       | 1       | 2       | 0       | 0       | 0       | 0       | 0       | 0       | 0 |
| Saccharicola_bicolor              | 0       | 0       | 0       | 0       | 0       | 0       | 0       | 0       | 0       | 0       | 0       | 0       | 1       | 0       | 1       | 0       | 0       | 0 |
| Sarocladium_strictum              | 0       | 0       | 0       | 0       | 0       | 0       | 0       | 0       | 4       | 0       | 0       | 0       | 0       | 0       | 0       | 0       | 0       | 0 |
| Schizophyllum_commune             | 0       | 0       | 0       | 0       | 0       | 0       | 0       | 0       | 0       | 0       | 0       | 1       | 0       | 0       | 0       | 0       | 0       | 0 |
| Scleroconidioma_sp.               | 0       | 1       | 0       | 0       | 0       | 0       | 1       | 0       | 1       | 0       | 13      | 7       | 0       | 1       | 2       | 0       | 0       | 0 |
| Scolecobasidium_sp.               | 0       | 0       | 0       | 0       | 0       | 0       | 0       | 0       | 2       | 0       | 1       | 0       | 0       | 1       | 0       | 0       | 0       | 0 |
| Scopuloides_rimosa                | 0       | 0       | 0       | 0       | 0       | 0       | 0       | 0       | 0       | 0       | 0       | 0       | 0       | 1       | 0       | 0       | 0       | 0 |
| Septoria_sp.                      | 0       | 0       | 0       | 0       | 0       | 0       | 0       | 0       | 0       | 0       | 0       | 0       | 0       | 0       | 0       | 1       | 0       | 0 |
| Septoria_tanacetii                | 0       | 0       | 0       | 0       | 0       | 0       | 0       | 0       | 1       | 0       | 0       | 0       | 0       | 0       | 0       | 0       | 0       | 0 |
| Simplicillium_lamellicola         | 0       | 0       | 0       | 0       | 0       | 0       | 0       | 0       | 1       | 0       | 1       | 0       | 0       | 0       | 0       | 1       | 0       | 0 |
| Simplicillium_sp.                 | 0       | 0       | 0       | 0       | 0       | 0       | 0       | 0       | 0       | 0       | 0       | 0       | 0       | 0       | 0       | 0       | 0       | 1 |
| Sirococcus_sp.                    | 0       | 1       | 0       | 0       | 0       | 0       | 0       | 0       | 0       | 0       | 1       | 0       | 1       | 0       | 0       | 0       | 0       | 1 |
| Sistotrema_brinkmannii            | 0       | 0       | 1       | 1       | 0       | 0       | 0       | 0       | 9       | 0       | 2       | 1       | 0       | 1       | 0       | 2       | 0       | 0 |
| Solenopezia_solenia               | 0       | 0       | 0       | 0       | 0       | 0       | 0       | 0       | 1       | 0       | 0       | 0       | 0       | 0       | 1       | 0       | 0       | 0 |
| Solicoccozyma_terricola           | 0       | 1       | 0       | 0       | 0       | 0       | 0       | 0       | 0       | 0       | 1       | 1       | 0       | 0       | 1       | 0       | 0       | 0 |
| Sorocybe_sp.                      | 0       | 0       | 0       | 0       | 0       | 0       | 0       | 0       | 1       | 1       | 1       | 1       | 0       | 1       | 0       | 0       | 0       | 2 |
| Sphaerellopsis_filum              | 2       | 3       | 0       | 1       | 0       | 0       | 0       | 0       | 1       | 1       | 10      | 5       | 1       | 3       | 4       | 0       | 1       | 2 |
| Sphaeria_chrysoesperma            | 0       | 0       | 0       | 1       | 0       | 0       | 0       | 0       | 0       | 0       | 1       | 0       | 0       | 0       | 0       | 0       | 0       | 0 |
| Spizellomyces_pseudodichotomus    | 0       | 0       | 0       | 1       | 1       | 1       | 0       | 0       | 0       | 0       | 7       | 4       | 0       | 1       | 2       | 0       | 0       | 0 |
| Sporendocladia_bactrospora        | 0       | 0       | 0       | 0       | 0       | 0       | 0       | 0       | 0       | 1       | 0       | 0       | 0       | 0       | 0       | 0       | 0       | 0 |
| Sporobolomyces_falcatus           | 0       | 0       | 0       | 0       | 0       | 4       | 0       | 0       | 0       | 2       | 0       | 3       | 0       | 0       | 0       | 0       | 0       | 0 |
| Sporobolomyces_inositophilus      | 1       | 4       | 1       | 0       | 5       | 3       | 0       | 6       | 2       | 38      | 21      | 0       | 1       | 7       | 2       | 0       | 0       | 1 |
| Sporobolomyces_sp.                | 0       | 0       | 1       | 0       | 3       | 1       | 0       | 1       | 1       | 10      | 1       | 0       | 0       | 0       | 0       | 0       | 0       | 0 |
| Squamarina_sp.                    | 0       | 0       | 0       | 0       | 0       | 0       | 0       | 0       | 0       | 0       | 0       | 1       | 0       | 0       | 0       | 0       | 0       | 0 |
| Stagonospora_sp.                  | 0       | 0       | 0       | 0       | 0       | 0       | 0       | 0       | 1       | 0       | 1       | 0       | 0       | 0       | 0       | 0       | 0       | 0 |
| Stereum_sp.                       | 0       | 0       | 0       | 0       | 0       | 0       | 0       | 0       | 0       | 0       | 0       | 0       | 0       | 0       | 1       | 0       | 0       | 0 |
| Strumella_sp.                     | 0       | 1       | 0       | 0       | 0       | 0       | 0       | 0       | 7       | 0       | 6       | 4       | 0       | 0       | 2       | 0       | 0       | 0 |
| Sugitazyma_miyagiana              | 0       | 0       | 0       | 0       | 0       | 1       | 0       | 0       | 0       | 0       | 5       | 0       | 0       | 0       | 0       | 0       | 0       | 0 |
| Suhomyces_tanzawaensis            | 0       | 0       | 0       | 0       | 0       | 0       | 0       | 0       | 0       | 1       | 0       | 0       | 2       | 0       | 0       | 0       | 0       | 0 |
| Sydowia_polyspora                 | 1       | 3       | 1       | 0       | 2       | 3       | 0       | 5       | 0       | 17      | 3       | 4       | 1       | 1       | 0       | 0       | 0       | 2 |
| Taphrina_sp.                      | 0       | 1       | 0       | 0       | 2       | 1       | 0       | 2       | 0       | 5       | 4       | 0       | 0       | 1       | 0       | 1       | 1       | 1 |
| Tetracladium_sp.                  | 0       | 0       | 0       | 0       | 0       | 0       | 0       | 0       | 0       | 0       | 0       | 1       | 0       | 0       | 0       | 0       | 0       | 0 |
| Teunomyces_kruisii                | 0       | 1       | 0       | 0       | 0       | 0       | 0       | 0       | 2       | 0       | 1       | 0       | 0       | 0       | 0       | 0       | 0       | 0 |
| Thekopsora_areolata               | 1       | 1       | 0       | 0       | 0       | 0       | 0       | 0       | 0       | 0       | 1       | 1       | 0       | 0       | 0       | 0       | 0       | 2 |
| Thysanophora_penicillioides       | 2       | 1       | 2       | 1       | 5       | 6       | 0       | 15      | 4       | 19      | 5       | 0       | 5       | 0       | 3       | 0       | 0       | 3 |
| Tolypocladium_sp.                 | 0       | 0       | 0       | 0       | 0       | 0       | 0       | 0       | 0       | 0       | 3       | 0       | 0       | 0       | 0       | 0       | 0       | 0 |
| Trametes_versicolor               | 0       | 0       | 0       | 0       | 0       | 0       | 0       | 1       | 0       | 0       | 0       | 4       | 0       | 0       | 0       | 0       | 0       | 0 |
| Trechispora_sp.                   | 0       | 1       | 0       | 0       | 0       | 1       | 0       | 0       | 0       | 0       | 1       | 0       | 1       | 0       | 1       | 0       | 0       | 0 |
| Tremella_globispora               | 0       | 0       | 0       | 0       | 0       | 1       | 0       | 0       | 0       | 0       | 2       | 0       | 0       | 0       | 0       | 0       | 0       | 1 |
| Tremella_sp.                      | 0       | 0       | 0       | 0       | 0       | 0       | 0       | 0       | 2       | 0       | 2       | 0       | 0       | 0       | 0       | 0       | 0       | 0 |
| Trichaptum_abietinum              | 0       | 1       | 0       | 0       | 0       | 0       | 0       | 0       | 1       | 0       | 2       | 1       | 0       | 1       | 0       | 0       | 0       | 0 |
| Trichoderma_polysporum            | 0       | 1       | 0       | 0       | 0       | 0       | 0       | 0       | 0       | 1       | 2       | 1       | 0       | 0       | 1       | 0       | 0       | 0 |

| Species/genus           | Insects |   |   |
|-------------------------|---------|---------|---------|---------|---------|---------|---------|---------|---------|---------|---------|---------|---------|---------|---------|---------|---------|---|---|
| <b>Fungi</b>            | Acr.inf | Aga.nig | Aga.sp  | Ani.hum | Anb.sp  | Ant.sp  | Cis.bol | End.coc | Epu.sp  | Gli.hor | Gli.qua | Oxy.alt | Que.sp  | Rhi.sp  | Sep.lit | Try.dom | Xyl.lae |   |   |
| Trichosporon_sp.        | 0       | 0       | 0       | 0       | 0       | 0       | 0       | 0       | 0       | 0       | 2       | 0       | 0       | 0       | 1       | 0       | 0       | 0 |   |
| Tricladium_attenuatum   | 0       | 0       | 0       | 0       | 1       | 0       | 0       | 0       | 0       | 0       | 0       | 1       | 0       | 0       | 0       | 0       | 0       | 0 | 0 |
| Troposporella_monilipes | 0       | 6       | 1       | 0       | 0       | 0       | 0       | 0       | 5       | 0       | 28      | 13      | 0       | 2       | 3       | 1       | 0       | 0 | 1 |
| Tryblidiopsis_pinastri  | 0       | 1       | 0       | 0       | 0       | 0       | 0       | 0       | 0       | 0       | 3       | 4       | 0       | 0       | 1       | 0       | 0       | 0 | 1 |
| Umbelopsis_ramanniana   | 0       | 0       | 0       | 0       | 0       | 0       | 0       | 0       | 2       | 0       | 0       | 0       | 0       | 0       | 0       | 0       | 0       | 0 | 0 |
| Umbilicaria_rigida      | 0       | 1       | 0       | 0       | 1       | 1       | 0       | 3       | 0       | 2       | 0       | 1       | 0       | 4       | 0       | 0       | 0       | 0 | 0 |
| Venturia_inaequalis     | 0       | 0       | 0       | 0       | 0       | 0       | 0       | 0       | 0       | 3       | 0       | 1       | 0       | 0       | 0       | 0       | 0       | 0 | 1 |
| Veronaea_sp.            | 0       | 0       | 0       | 0       | 0       | 0       | 0       | 1       | 0       | 3       | 0       | 0       | 0       | 0       | 0       | 0       | 0       | 0 | 0 |
| Verticillium_sp.        | 0       | 0       | 0       | 0       | 0       | 0       | 0       | 3       | 0       | 0       | 0       | 0       | 0       | 0       | 0       | 0       | 0       | 0 | 0 |
| Vishniacozyma_follicola | 0       | 0       | 0       | 0       | 0       | 0       | 0       | 1       | 0       | 1       | 0       | 0       | 0       | 0       | 0       | 0       | 0       | 0 | 0 |
| Vishniacozyma_victoriae | 1       | 0       | 1       | 0       | 1       | 1       | 0       | 3       | 4       | 12      | 7       | 0       | 0       | 0       | 0       | 0       | 0       | 0 | 2 |
| Vulpicida_pinastri      | 0       | 0       | 0       | 0       | 0       | 1       | 0       | 0       | 0       | 0       | 0       | 0       | 0       | 0       | 0       | 0       | 0       | 0 | 0 |
| Wickerhamomyces_sp.     | 0       | 0       | 0       | 0       | 0       | 0       | 0       | 0       | 0       | 0       | 3       | 0       | 0       | 0       | 0       | 0       | 0       | 0 | 0 |
| Xenochalara_juniperi    | 0       | 0       | 0       | 0       | 1       | 1       | 0       | 4       | 0       | 8       | 0       | 0       | 2       | 1       | 0       | 0       | 0       | 0 | 1 |
| Zalerion_sp.            | 0       | 1       | 0       | 0       | 0       | 2       | 0       | 3       | 0       | 18      | 7       | 1       | 0       | 3       | 0       | 0       | 0       | 0 | 0 |



Table S2) Abbreviations and references for insect symbiont fungi

| Insect symbiont fungi                      | Abbreviation | Species (old genus)                                     | Reference                                                                                                                                                                                                      |
|--------------------------------------------|--------------|---------------------------------------------------------|----------------------------------------------------------------------------------------------------------------------------------------------------------------------------------------------------------------|
| Candida                                    | Can.sp       | <b>Candida</b>                                          | Gibson & Hunter 2010; Klimaszewski et al 2013; Grünwald et al 2010; Houseknecht et al 2011; Hu et al 2015; Zhang et al 2003; Nguyen et al 2006; Suh et al 2004; Suh et al 2005; Suh et al 2006; Suh et al 2013 |
| Candida fructus                            | Can.fru      | <b>Candida fructus</b>                                  | Gibson & Hunter 2010; Klimaszewski et al 2013; Grünwald et al 2010; Houseknecht et al 2011; Hu et al 2015; Zhang et al 2003; Nguyen et al 2006; Suh et al 2004; Suh et al 2005; Suh et al 2006; Suh et al 2013 |
| Candida mesenterica                        | Can.mes      | <b>Teunomyces (Candida) kruisii</b>                     | Gibson & Hunter 2010; Klimaszewski et al 2013; Grünwald et al 2010; Houseknecht et al 2011; Hu et al 2015; Zhang et al 2003; Nguyen et al 2006; Suh et al 2004; Suh et al 2005; Suh et al 2006; Suh et al 2013 |
| Candida sake                               | Can.sak      | <b>Candida mesenterica</b>                              | Gibson & Hunter 2010; Klimaszewski et al 2013; Grünwald et al 2010; Houseknecht et al 2011; Hu et al 2015; Zhang et al 2003; Nguyen et al 2006; Suh et al 2004; Suh et al 2005; Suh et al 2006; Suh et al 2013 |
| Candida schatavii                          | Can.sch      | <b>Candida sake</b>                                     | Gibson & Hunter 2010; Klimaszewski et al 2013; Grünwald et al 2010; Houseknecht et al 2011; Hu et al 2015; Zhang et al 2003; Nguyen et al 2006; Suh et al 2004; Suh et al 2005; Suh et al 2006; Suh et al 2013 |
| Candida trypodendroni                      | Can.try      | <b>Candida schatavii</b>                                | Gibson & Hunter 2010; Klimaszewski et al 2013; Grünwald et al 2010; Houseknecht et al 2011; Hu et al 2015; Zhang et al 2003; Nguyen et al 2006; Suh et al 2004; Suh et al 2005; Suh et al 2006; Suh et al 2013 |
| Carcinomyces polyporina                    | Car.pol      | <b>Suhomyces (Candida) tanzawaensis</b>                 | Gibson & Hunter 2010; Klimaszewski et al 2013; Grünwald et al 2010; Houseknecht et al 2011; Hu et al 2015; Zhang et al 2003; Nguyen et al 2006; Suh et al 2004; Suh et al 2005; Suh et al 2006; Suh et al 2013 |
| Cryptococcus                               | Cry.sp       | <b>Candida trypodendroni</b>                            | Gibson & Hunter 2010; Klimaszewski et al 2013; Grünwald et al 2010; Houseknecht et al 2011; Hu et al 2015; Zhang et al 2003; Nguyen et al 2006; Suh et al 2004; Suh et al 2005; Suh et al 2006; Suh et al 2013 |
| Cryptococcus aff.amylolyticus              | Cry.amy      | <b>Carcinomyces polyporina</b>                          | Suh et al 2005                                                                                                                                                                                                 |
| Cryptococcus huempii                       | Cry.hue      | <b>Cryptococcus</b>                                     | Suh et al 2005; Zhang et al 2003                                                                                                                                                                               |
| Cryptococcus neoformans var. uniguttulatum | Cry.uni      | <b>Naganishia (Cryptococcus) adeliensis</b>             | Suh et al 2005; Zhang et al 2003                                                                                                                                                                               |
| Cryptococcus stepposus                     | Cry.ste      | <b>Cryptococcus aff.amylolyticus</b>                    | Suh et al 2005; Zhang et al 2003                                                                                                                                                                               |
| Debaryomyces hansenii                      | Deb.han      | <b>Piskurozyma (Cryptococcus) cylindricus</b>           | Suh et al 2005; Zhang et al 2003                                                                                                                                                                               |
| Filobasidium wieringae                     | Fil.wie      | <b>Vishniacozyma (Cryptococcus) foliicola</b>           | Suh et al 2005; Zhang et al 2003                                                                                                                                                                               |
| Fusarium solani                            | Fus.sol      | <b>Cryptococcus huempii</b>                             | Suh et al 2005; Zhang et al 2003                                                                                                                                                                               |
| Leucosporidium                             | Leu.sp       | <b>Cryptococcus stepposus</b>                           | Suh et al 2005; Zhang et al 2003                                                                                                                                                                               |
| Naematelia aurantialba                     | Nae.aur      | <b>Solicoccozyma (Cryptococcus) terricola</b>           | Suh et al 2005; Zhang et al 2003                                                                                                                                                                               |
| Naganishia adeliensis                      | Nag.ade      | <b>Vishniacozyma (Cryptococcus) victoriae</b>           | Suh et al 2005; Zhang et al 2003                                                                                                                                                                               |
| Ophiostoma canum                           | Oph.can      | <b>Filobasidium (Cryptococcus) wieringae</b>            | Suh et al 2005; Zhang et al 2003                                                                                                                                                                               |
| Ophiostoma karelicum                       | Oph.kar      | <b>Debaryomyces hansenii</b>                            | Suh et al 2005                                                                                                                                                                                                 |
| Ophiostoma piceae                          | Oph.pic      | <b>Cryptococcus neoformans var. uniguttulatum</b>       | Suh et al 2005; Zhang et al 2003                                                                                                                                                                               |
| Ophiostoma quercus                         | Oph.que      | <b>Fusarium solani</b>                                  | Six 2012                                                                                                                                                                                                       |
| Ophiostoma tetropii                        | Oph.tet      | <b>Leucosporidium</b>                                   | Suh et al 2005                                                                                                                                                                                                 |
| Phaeotremella pseudofoliacea               | Pha.fol      | <b>Ophiostoma canum</b>                                 | Gibson & Hunter 2010; Kirisits 2007                                                                                                                                                                            |
| Phialophoropsis ferruginea                 | Phi.fer      | <b>Ophiostoma karelicum</b>                             | Gibson & Hunter 2010; Kirisits 2007                                                                                                                                                                            |
| Piskurozyma cylindrica                     | Pis.cyl      | <b>Ophiostoma piceae</b>                                | Six 2012; Kirisits 2007                                                                                                                                                                                        |
| Solicoccozyma terricola                    | Sol.ter      | <b>Ophiostoma quercus</b>                               | Gibson & Hunter 2010; Kirisits 2007                                                                                                                                                                            |
| Suhomyces tanzawaensis                     | Suh.tan      | <b>Ophiostoma tetropii</b>                              | Gibson & Hunter 2010; Kirisits 2007                                                                                                                                                                            |
| Taphrina                                   | Tap.sp       | <b>Phialophoropsis ferruginea</b>                       | Vega & Blackwell 2005; Kirisits 2007                                                                                                                                                                           |
| Teunomyces kruisii                         | Teu.kru      | <b>Taphrina</b>                                         | Suh et al 2005                                                                                                                                                                                                 |
| Tremella                                   | Tre.sp       | <b>Tremella</b>                                         | Suh et al 2005                                                                                                                                                                                                 |
| Tremella globispora                        | Tre.glo      | <b>Tremella aurantialba</b>                             | Suh et al 2005                                                                                                                                                                                                 |
| Trichosporon                               | Tri.sp       | <b>Tremella globospora</b>                              | Suh et al 2005                                                                                                                                                                                                 |
| Vishniacozyma foliicola                    | Vis.fol      | <b>Phaeotremella (Tremella foliacea) pseudofoliacea</b> | Suh et al 2005                                                                                                                                                                                                 |
| Vishniacozyma victoriae                    | Vis.vic      |                                                         |                                                                                                                                                                                                                |

**Full references**

- Gibson, C.M. & Hunter, M.S. (2010) Extraordinarily widespread and fantastically complex: comparative biology of endosymbiotic bacterial and fungal mutualists of insects. *Ecology Letters*, 13, 223-234.
- Grünwald, S., Pilhofer, M. & Höll, W. (2010) Microbial associations in gut systems of wood-and bark-inhabiting longhorned beetles [Coleoptera: Cerambycidae]. *Systematic and Applied Microbiology*, 33, 25-34.
- Houseknecht, J.L., Hart, E.L., Suh, S.-O. & Zhou, J.J. (2011) Yeasts in the Sugiyamaella clade associated with wood-ingesting beetles and the proposal of *Candida bullrunensis* sp. nov. *International Journal of Systematic and Evolutionary Microbiology*, 61, 1751-1756.
- Hu, X., Li, M. & Chen, H. (2015) Community structure of gut fungi during different developmental stages of the Chinese white pine beetle (*Dendroctonus armandi*). *Scientific reports*, 5.
- Kirisits, T. (2007) Fungal associates of European bark beetles with special emphasis on the ophiostomatoid fungi. *Bark and wood boring insects in living trees in Europe, a synthesis*, pp. 181-236. Springer, Netherlands.
- Klimaszewski, J., Morency, M.-J., Labrie, P., Seguin, A., Langor, D., Work, T., Bourdon, C., Thiffault, E., Pare, D. & Newton, A.F. (2013) Molecular and microscopic analysis of the gut contents of abundant rove beetle species (Coleoptera, Staphylinidae) in the boreal balsam fir forest of Quebec, Canada. *ZooKeys*, 1-24.
- Nguyen, N.H., Suh, S.-O., Marshall, C.J. & Blackwell, M. (2006) Morphological and ecological similarities: wood-boring beetles associated with novel xylose-fermenting yeasts, *Spathaspora passalidarum* gen. sp. nov. and *Candida jeffreiesii* sp. nov. *Mycological Research*, 110, 1232-1241.
- Six, D.L. (2012) Ecological and evolutionary determinants of bark beetle—fungus symbioses. *Insects*, 3, 339-366.

Suh, S.-O. & Blackwell, M. (2005) Four new yeasts in the *Candida mesenterica* clade associated with basidiocarp-feeding beetles. *Mycologia*, 97, 167-177.

Suh, S.-O., Houseknecht, J.L., Gujjari, P. & Zhou, J.J. (2013) *Scheffersomyces parashehatae* fa, sp. nov., *Scheffersomyces xylosifermentans* fa, sp. nov., *Candida broadrunensis* sp. nov. and *Candida manassasensis* sp. nov., novel yeasts associated with wood-ingesting insects, and their ecological and biofuel implications. *International Journal of Systematic and Evolutionary Microbiology*, 63, 4330-4339.

Suh, S.-O., McHugh, J.V. & Blackwell, M. (2004) Expansion of the *Candida tanzawaensis* yeast clade: 16 novel *Candida* species from basidiocarp-feeding beetles. *International Journal of Systematic and Evolutionary Microbiology*, 54, 2409-2429.

Suh, S.-O., McHugh, J.V., Pollock, D.D. & Blackwell, M. (2005) The beetle gut: a hyperdiverse source of novel yeasts. *Mycological Research*, 109, 261-265.

Vega, F.E. & Blackwell, M. (2005) *Insect-fungal associations: ecology and evolution*. Oxford University Press.

Zhang, N., Suh, S.-O. & Blackwell, M. (2003) Microorganisms in the gut of beetles: evidence from molecular cloning. *Journal of Invertebrate Pathology*, 84, 226-233.

Table S3) Abbreviations and references for wood-decay fungi

| Wood-living fungi        | Abbreviation | Guild reference                                |
|--------------------------|--------------|------------------------------------------------|
| Amylocystis lapponica    | Amy.lap      | Ryvarden & Melo 2014                           |
| Antrodiella parasitica   | Ant.par      | Ryvarden & Melo 2014                           |
| Chondrostereum purpureum | Cho.pur      | Bernicchia & Gorjón 2010                       |
| Corticium roseum         | Cor.ros      | Bernicchia & Gorjón 2010                       |
| Fibulorhizoctonia        | Fib.sp       | Nguyen et al 2016                              |
| Fomes fomentarius        | Fom.fom      | Ryvarden & Melo 2014                           |
| Fomitopsis pinicola      | Fom.pin      | Ryvarden & Melo 2014                           |
| Kneiffiella abieticola   | Kne.abi      | Ottosson et al 2015; Nguyen et al 2016         |
| Kuehneromyces lignicola  | Kue.lig      | Ottosson et al 2015; Nguyen et al 2016         |
| Mycena rubromarginata    | Myc.rub      | Knudsen & Vesterholt 2012                      |
| Peniophora               | Peni.sp      | Andreasen & Hallenberg 2009; Nguyen et al 2016 |
| Phlebia centrifuga       | Phl.cen      | Ryvarden & Melo 2014                           |
| Pseudochaete intricata   | Pse.int      | Nguyen et al 2016                              |
| Resinicium bicolor       | Res.bic      | Ottosson et al 2015                            |
| Schizophyllum commune    | Sch.com      | Nguyen et al 2016                              |
| Scopuloides rimosa       | Sco.rim      | Nguyen et al 2016                              |
| Sistotrema brinkmannii   | Sis.bri      | Bernicchia & Gorjón 2010; Nguyen et al 2016    |
| Stereum                  | Ste.sp       | Nguyen et al 2016                              |
| Trametes versicolor      | Tra.ver      | Ryvarden & Melo 2014                           |
| Trechispora              | Tre.sp       | Nguyen et al 2016                              |
| Trichaptum abietinum     | Tri.abi      | Ryvarden & Melo 2014                           |
| Heterobasidion           | Het.sp       | Nguyen et al 2016                              |

#### Full references

Andreasen, M. & Hallenberg, N. (2009) A taxonomic survey of the Peniophoraceae. *Synopsis Fungorum*, 26, 56-119.

Bernicchia, A. & Gorjón, S.P. (2010) *Corticaceae s.l.*, 12 edn. Candusso Edizioni, Alassio, Italia.

Knudsen, H. & Vesterholt, J. (2012) *Funga Nordica: Agaricoid, boletoid, clavarioid, cyphelloid and gastroid genera*. Nordsvamp, Copenhagen, Denmark.

Nguyen, N.H., Song, Z., Bates, S.T., Branco, S., Tedersoo, L., Menke, J., Schilling, J.S. & Kennedy, P.G. (2016) FUNGuild: an open annotation tool for parsing fungal community datasets by ecological guild. *Fungal Ecology*, 20, 241-248.

Ottosson, E., Kubartová, A., Edman, M., Jönsson, M., Lindhe, A., Stenlid, J. & Dahlberg, A. (2015) Diverse ecological roles within fungal communities in decomposing logs of *Picea abies*. *FEMS Microbiology Ecology*, 91, fiv012.

Ryvarden, L. & Melo, I. (2014) *Poroid fungi of Europe*. Fungiflora, Oslo, Norway.

Table S4) Abbreviations and references for plant pathogenic fungi.

| <b>Plant pathogen fungi</b>    | <b>Abbreviation</b> | <b>Guild reference</b> |
|--------------------------------|---------------------|------------------------|
| Alternaria_alternata           | Alt.alt             | Tedersoo et al. 2014   |
| Alternaria_infectoria          | Alt.inf             | Tedersoo et al. 2014   |
| Botryotinia_fuckeliana         | Bot.fuc             | Tedersoo et al. 2014   |
| Ceratocystis_paradoxa          | Cer.par             | Tedersoo et al. 2014   |
| Sphaeria_chrysosperma          | Sph.chr             | Tedersoo et al. 2014   |
| Dactylaria_dimorphospora       | Dac.dim             | Nguyen et al. 2016     |
| Devriesia                      | Dev.sp              | Tedersoo et al. 2014   |
| Exobasidium                    | Exo.sp              | Tedersoo et al. 2014   |
| Exobasidium_arescens           | Exo.are             | Tedersoo et al. 2014   |
| Exobasidium_bisporum           | Exo.bis             | Tedersoo et al. 2014   |
| Exobasidium_maculosum          | Exo.mac             | Tedersoo et al. 2014   |
| Fusarium_ciliatum              | Fus.cil             | Tedersoo et al. 2014   |
| Fusicolla_merismoides          | Fus.mes             | Tedersoo et al. 2014   |
| Fusarium_tricinatum            | Fus.tri             | Tedersoo et al. 2014   |
| Grosmannia_cucullata           | Gro.cuc             | Tedersoo et al. 2014   |
| Grosmannia_francke-grosmanniae | Gro.fra             | Tedersoo et al. 2014   |
| Hortaea                        | Hor.sp              | Tedersoo et al. 2014   |
| Hyalopeziza                    | Hya.sp              | Nguyen et al. 2016     |
| Ilyonectria_hubeiensis         | Ily.hub             | Tedersoo et al. 2014   |
| Leptographium                  | Lepg.sp             | Nguyen et al. 2016     |
| Leptographium_piriforme        | Lepg.pir            | Nguyen et al. 2016     |
| Leptosphaeria                  | Lep.sp              | Tedersoo et al. 2014   |
| Libertella                     | Lib.sp              | Nguyen et al. 2016     |
| Lirula_yunnanensis             | Lir.yun             | Nguyen et al. 2016     |
| Lophodermium_conigenum         | Lop.con             | Tedersoo et al. 2014   |
| Lophodermium_piceae            | Lop.pic             | Tedersoo et al. 2014   |
| Melampsora                     | Mel.sp              | Tedersoo et al. 2014   |
| Mollisia                       | Mol.sp              | Tedersoo et al. 2014   |
| Monilinia                      | Mon.sp              | Tedersoo et al. 2014   |
| Mycocentrospora_acerina        | Mycc.ace            | Nguyen et al. 2016     |
| Neonectria                     | Neo.sp              | Tedersoo et al. 2014   |
| Neonectria_fuckeliana          | Neo.fuc             | Tedersoo et al. 2014   |
| Neonectria_obtusispora         | Neo.obt             | Tedersoo et al. 2014   |
| Neonectria_punicea             | Neo.pun             | Tedersoo et al. 2014   |
| Parascedosporium_putredinis    | Par.put             | Nguyen et al. 2016     |
| Pezicula_melanigena            | Pez.mel             | Tedersoo et al. 2014   |
| Phacidium_lacerum              | Phac.lac            | Nguyen et al. 2016     |
| Phaeocryptopus_gaeumannii      | Phae.gae            | Nguyen et al. 2016     |
| Podosphaera                    | Pod.sp              | Tedersoo et al. 2014   |
| Podosphaera_clandestina        | Pod.cla             | Tedersoo et al. 2014   |
| Polyscytalum                   | Pol.sp              | Tedersoo et al. 2014   |
| Powellomyces                   | Pow.sp              | Nguyen et al. 2016     |
| Protomyces                     | Pro.sp              | Tedersoo et al. 2014   |
| Pseudocercospora_fraxini       | Pse.fra             | Tedersoo et al. 2014   |
| Thekopsora_areolata            | The.are             | Tedersoo et al. 2014   |
| Ramichloridium_pini            | Rami.pin            | Tedersoo et al. 2014   |
| Ramularia_stellenboschensis    | Ramu.stel           | Tedersoo et al. 2014   |
| Rhizosphaera                   | Rhi.sp              | Nguyen et al. 2016     |

|                                |          |                      |
|--------------------------------|----------|----------------------|
| Rhizosphaera_kalkhoffii        | Rhi.kal  | Nguyen et al. 2016   |
| Scleroconidioma                | Scl.sp   | Tedersoo et al. 2014 |
| Mycosphaerella_grossulariae    | Myc.gros | Tedersoo et al. 2014 |
| Septoria                       | Sep.sp   | Tedersoo et al. 2014 |
| Septoria_tanacetii             | Sep.tan  | Tedersoo et al. 2014 |
| Sirococcus                     | Sir.sp   | Tedersoo et al. 2014 |
| Spizellomyces_pseudodichotomus | Spi.pse  | Tedersoo et al. 2014 |
| Sporendocladia_bactrospora     | Spo.bac  | Tedersoo et al. 2014 |
| Stagonospora                   | Sta.sp   | Tedersoo et al. 2014 |
| Tryblidiopsis_pinastri         | Try.pin  | Tedersoo et al. 2014 |
| Venturia_inaequalis            | Ven.ina  | Nguyen et al. 2016   |
| Verticillium                   | Ver.sp   | Tedersoo et al. 2014 |
| Leptobacillium leptobactrum    | Lept.lep | Tedersoo et al. 2014 |

### Full reference

Tedersoo, L., Bahram, M., Pöhlme, S., Kõljalg, U., Yorou, N.S., Wijesundera, R., Ruiz, L.V., Vasco-Palacios, A.M., Thu, P.Q. & Suija, A. (2014) Global diversity and geography of soil fungi. *Science*, 346.

Nguyen, N.H., Song, Z., Bates, S.T., Branco, S., Tedersoo, L., Menke, J., Schilling, J.S. & Kennedy, P.G. (2016) FUNGuild: an open annotation tool for parsing fungal community datasets by ecological guild. *Fungal Ecology*, 20,



| Species/genus |         | Fungi   |
|---------------|---------|---------|---------|---------|---------|---------|---------|---------|---------|---------|---------|---------|---------|
| Abbreviations |         | Nag.ade | Cry.amy | Pis.cyl | Vis.fol | Cry.hue | Cry.ste | Sol.ter | Vis.vic | Fil.wie | Deb.han | Cry.uni | Fus.sol |
| Insects       | Acr.inf | 0       | 0       | 0       | 0       | 0       | 0       | 0       | 0       | 1       | 0       | 0       | 0       |
| Insects       | Aga.nig | 0       | 0       | 0       | 0       | 0       | 0       | 0       | 1       | 0       | 0       | 2       | 0       |
| Insects       | Aga.sp  | 1       | 0       | 1       | 0       | 0       | 0       | 1       | 0       | 1       | 0       | 0       | 0       |
| Insects       | Ani.hum | 0       | 0       | 0       | 0       | 0       | 0       | 0       | 0       | 0       | 0       | 0       | 0       |
| Insects       | Anb.sp  | 0       | 0       | 0       | 0       | 2       | 0       | 0       | 0       | 1       | 1       | 0       | 0       |
| Insects       | Ant.sp  | 1       | 1       | 0       | 0       | 1       | 0       | 0       | 0       | 1       | 0       | 0       | 2       |
| Insects       | Cis.bol | 0       | 0       | 0       | 0       | 0       | 0       | 0       | 0       | 0       | 0       | 0       | 1       |
| Insects       | End.coc | 1       | 0       | 1       | 1       | 2       | 0       | 0       | 0       | 3       | 0       | 3       | 0       |
| Insects       | Epu.sp  | 0       | 0       | 0       | 0       | 2       | 0       | 0       | 0       | 4       | 1       | 0       | 0       |
| Insects       | Gli.hor | 1       | 1       | 5       | 1       | 8       | 0       | 0       | 1       | 12      | 1       | 4       | 0       |
| Insects       | Gli.qua | 4       | 2       | 8       | 0       | 3       | 0       | 0       | 1       | 7       | 2       | 3       | 0       |
| Insects       | Oxy.alt | 1       | 1       | 0       | 0       | 0       | 0       | 0       | 0       | 0       | 0       | 0       | 0       |
| Insects       | Que.sp  | 0       | 0       | 0       | 0       | 0       | 0       | 0       | 0       | 0       | 0       | 0       | 1       |
| Insects       | Rhi.sp  | 2       | 0       | 1       | 0       | 0       | 0       | 0       | 1       | 0       | 0       | 1       | 0       |
| Insects       | Sep.lit | 1       | 0       | 1       | 0       | 1       | 0       | 0       | 0       | 0       | 0       | 0       | 0       |
| Insects       | Try.dom | 0       | 0       | 0       | 0       | 0       | 0       | 0       | 0       | 0       | 0       | 0       | 0       |
| Insects       | Xyl.lae | 0       | 0       | 0       | 0       | 1       | 0       | 0       | 0       | 2       | 0       | 0       | 0       |

| Species/ge | Fungi  | Fungi   | Fungi   | Fungi   | Fungi   | Fungi   | Fungi   | Fungi  | Fungi   | Fungi  | Fungi   | Fungi   | Fungi  |
|------------|--------|---------|---------|---------|---------|---------|---------|--------|---------|--------|---------|---------|--------|
| Abbreviati | Leu.sp | Oph.can | Oph.kar | Oph.pic | Oph.que | Oph.tet | Phi.fer | Tap.sp | Tre.glo | Tre.sp | Nae.aur | Pha.fol | Tri.sp |
| Acr.inf    | 0      | 0       | 0       | 0       | 0       | 0       | 0       | 0      | 0       | 0      | 0       | 0       | 0      |
| Aga.nig    | 0      | 2       | 0       | 0       | 0       | 0       | 0       | 0      | 1       | 0      | 0       | 0       | 0      |
| Aga.sp     | 0      | 0       | 0       | 0       | 0       | 0       | 0       | 0      | 1       | 0      | 0       | 0       | 0      |
| Ani.hum    | 0      | 0       | 0       | 0       | 0       | 0       | 0       | 0      | 0       | 0      | 0       | 0       | 0      |
| Anb.sp     | 1      | 0       | 0       | 0       | 0       | 0       | 0       | 0      | 2       | 1      | 0       | 0       | 1      |
| Ant.sp     | 1      | 0       | 0       | 0       | 0       | 0       | 0       | 0      | 1       | 0      | 0       | 1       | 0      |
| Cis.bol    | 0      | 0       | 0       | 0       | 0       | 0       | 0       | 0      | 0       | 0      | 0       | 0       | 0      |
| End.coc    | 0      | 0       | 0       | 0       | 0       | 0       | 0       | 0      | 2       | 0      | 2       | 0       | 0      |
| Epu.sp     | 2      | 2       | 2       | 2       | 1       | 0       | 1       | 0      | 0       | 0      | 0       | 0       | 0      |
| Gli.hor    | 9      | 3       | 1       | 0       | 0       | 0       | 1       | 6      | 2       | 2      | 2       | 2       | 3      |
| Gli.qua    | 9      | 15      | 2       | 2       | 0       | 4       | 3       | 5      | 0       | 0      | 0       | 0       | 0      |
| Oxy.alt    | 0      | 1       | 0       | 0       | 0       | 0       | 0       | 0      | 0       | 0      | 0       | 0       | 0      |
| Que.sp     | 0      | 2       | 0       | 1       | 0       | 1       | 0       | 0      | 0       | 0      | 0       | 0       | 0      |
| Rhi.sp     | 0      | 3       | 0       | 1       | 0       | 0       | 0       | 2      | 0       | 0      | 0       | 0       | 1      |
| Sep.lit    | 0      | 1       | 0       | 0       | 0       | 0       | 1       | 0      | 0       | 0      | 0       | 0       | 0      |
| Try.dom    | 0      | 0       | 0       | 0       | 0       | 0       | 1       | 1      | 0       | 0      | 0       | 1       | 0      |
| Xyl.lae    | 0      | 0       | 0       | 0       | 0       | 0       | 1       | 1      | 1       | 1      | 0       | 0       | 0      |



Table S6) Network data for wood-decay fungi in the class Agaricomycetes isolated from wood-inhabiting beetles

| Species/genus                  |              | Fungi   | Fungi   | Fungi   | Fungi   | Fungi  | Fungi   | Fungi   | Fungi   | Fungi   |
|--------------------------------|--------------|---------|---------|---------|---------|--------|---------|---------|---------|---------|
| Insects                        | Abbreviation | Amy.lap | Ant.par | Cho.pur | Cor.ros | Fib.sp | Fom.fom | Fom.pin | Kne.abi | Kue.lig |
| Acrulia inflata                | Acr.inf      | 0       | 1       | 2       | 0       | 0      | 0       | 0       | 0       | 0       |
| Agathidium nigripenne          | Aga.nig      | 1       | 0       | 8       | 0       | 0      | 0       | 0       | 0       | 0       |
| Agathidium sp                  | Aga.sp       | 0       | 0       | 3       | 0       | 1      | 0       | 0       | 0       | 0       |
| Anisotoma humeralis            | Ani.hum      | 0       | 0       | 0       | 0       | 0      | 1       | 0       | 0       | 0       |
| Anthobium sp                   | Anb.sp       | 0       | 0       | 3       | 0       | 0      | 0       | 0       | 0       | 1       |
| Anthophagus sp                 | Ant.sp       | 1       | 0       | 1       | 0       | 0      | 0       | 1       | 0       | 0       |
| Cis boleti                     | Cis.bol      | 0       | 0       | 0       | 0       | 0      | 0       | 0       | 0       | 0       |
| Endomychus coccineus           | End.coc      | 1       | 0       | 15      | 0       | 0      | 0       | 0       | 1       | 1       |
| Epuraea sp                     | Epu.sp       | 1       | 0       | 0       | 0       | 0      | 1       | 0       | 0       | 0       |
| Glischrochilus hortensis       | Gli.hor      | 0       | 0       | 16      | 0       | 2      | 11      | 2       | 0       | 0       |
| Glischrochilus quadripunctatus | Gli.qua      | 2       | 0       | 21      | 0       | 0      | 1       | 2       | 0       | 0       |
| Oxypoda alternans              | Oxy.alt      | 0       | 0       | 0       | 0       | 0      | 0       | 0       | 0       | 0       |
| Quedius sp                     | Que.sp       | 0       | 0       | 1       | 0       | 0      | 0       | 0       | 0       | 0       |
| Rhizophagus sp                 | Rhi.sp       | 1       | 0       | 7       | 0       | 0      | 0       | 0       | 0       | 1       |
| Sepedophilus littoreus         | Sep.lit      | 0       | 0       | 2       | 0       | 1      | 0       | 1       | 0       | 0       |
| Trypodendron domesticum        | Try.dom      | 0       | 0       | 0       | 0       | 0      | 0       | 0       | 0       | 0       |
| Xylita laevigata               | Xyl.lae      | 0       | 0       | 2       | 1       | 1      | 2       | 1       | 0       | 0       |



Table S7) Network data for plant pathogenic fungi isolated from wood-inhabiting beetles

| Species/genus                  |              | Fungi   | Fungi   | Fungi   | Fungi   | Fungi   | Fungi   | Fungi  | Fungi  | Fungi   |
|--------------------------------|--------------|---------|---------|---------|---------|---------|---------|--------|--------|---------|
| Insects                        | Abbreviation | Alt.alt | Alt.inf | Bot.fuc | Cer.par | Sph.chr | Dac.dim | Dev.sp | Exo.sp | Exo.are |
| Acrulia inflata                | Acr.inf      | 1       | 0       | 0       | 0       | 0       | 0       | 0      | 1      | 4       |
| Agathidium nigripenne          | Aga.nig      | 0       | 0       | 0       | 0       | 0       | 3       | 0      | 0      | 1       |
| Agathidium sp                  | Aga.sp       | 0       | 0       | 0       | 0       | 0       | 0       | 0      | 1      | 0       |
| Anisotoma humeralis            | Ani.hum      | 0       | 0       | 0       | 0       | 1       | 0       | 0      | 0      | 0       |
| Anthobium sp                   | Anb.sp       | 0       | 0       | 1       | 0       | 0       | 1       | 0      | 2      | 0       |
| Anthophagus sp                 | Ant.sp       | 1       | 0       | 1       | 0       | 0       | 0       | 0      | 3      | 1       |
| Cis boleti                     | Cis.bol      | 0       | 0       | 0       | 0       | 0       | 0       | 0      | 0      | 0       |
| Endomychus coccineus           | End.coc      | 0       | 1       | 4       | 0       | 0       | 9       | 0      | 6      | 1       |
| Epuraea sp                     | Epu.sp       | 0       | 0       | 1       | 1       | 0       | 0       | 0      | 2      | 0       |
| Glischrochilus hortensis       | Gli.hor      | 0       | 1       | 2       | 0       | 1       | 4       | 0      | 8      | 6       |
| Glischrochilus quadripunctatus | Gli.qua      | 1       | 0       | 1       | 0       | 0       | 7       | 0      | 4      | 2       |
| Oxypoda alternans              | Oxy.alt      | 0       | 1       | 0       | 0       | 0       | 0       | 0      | 1      | 1       |
| Quedius sp                     | Que.sp       | 0       | 0       | 1       | 1       | 0       | 0       | 0      | 1      | 0       |
| Rhizophagus sp                 | Rhi.sp       | 0       | 0       | 0       | 0       | 0       | 1       | 0      | 1      | 0       |
| Sepedophilus littoreus         | Sep.lit      | 0       | 0       | 0       | 0       | 0       | 0       | 0      | 2      | 0       |
| Trypodendron domesticum        | Try.dom      | 0       | 0       | 0       | 0       | 0       | 0       | 0      | 0      | 0       |
| Xylita laevigata               | Xyl.lae      | 0       | 1       | 1       | 0       | 0       | 0       | 1      | 3      | 1       |



| Species/genus |         | Fungi  | Fungi  | Fungi   | Fungi   | Fungi   | Fungi  | Fungi  | Fungi  | Fungi    | Fungi  | Fungi   | Fungi   |
|---------------|---------|--------|--------|---------|---------|---------|--------|--------|--------|----------|--------|---------|---------|
| Abbreviations |         | Lep.sp | Lib.sp | Lir.yun | Lop.con | Lop.pic | Mel.sp | Mol.sp | Mon.sp | Mycc.ace | Neo.sp | Neo.fuc | Neo.obt |
| Insects       | Acr.inf | 0      | 0      | 0       | 1       | 4       | 0      | 0      | 0      | 0        | 0      | 0       | 0       |
| Insects       | Aga.nig | 1      | 0      | 0       | 0       | 1       | 1      | 0      | 0      | 0        | 2      | 0       | 1       |
| Insects       | Aga.sp  | 0      | 0      | 0       | 0       | 1       | 0      | 0      | 0      | 0        | 1      | 0       | 1       |
| Insects       | Ani.hum | 0      | 0      | 0       | 0       | 0       | 0      | 0      | 0      | 0        | 0      | 0       | 0       |
| Insects       | Anb.sp  | 2      | 1      | 0       | 0       | 5       | 0      | 1      | 0      | 0        | 0      | 1       | 0       |
| Insects       | Ant.sp  | 0      | 0      | 0       | 0       | 1       | 0      | 1      | 0      | 0        | 0      | 0       | 0       |
| Insects       | Cis.bol | 0      | 0      | 0       | 0       | 0       | 0      | 0      | 0      | 0        | 0      | 0       | 0       |
| Insects       | End.coc | 7      | 0      | 2       | 0       | 13      | 0      | 1      | 0      | 1        | 4      | 0       | 3       |
| Insects       | Epu.sp  | 0      | 0      | 1       | 0       | 3       | 0      | 0      | 0      | 0        | 0      | 0       | 0       |
| Insects       | Gli.hor | 13     | 0      | 6       | 0       | 35      | 0      | 0      | 0      | 0        | 7      | 0       | 8       |
| Insects       | Gli.qua | 7      | 0      | 0       | 0       | 22      | 0      | 0      | 0      | 0        | 4      | 2       | 7       |
| Insects       | Oxy.alt | 1      | 0      | 0       | 0       | 1       | 0      | 0      | 0      | 0        | 0      | 0       | 0       |
| Insects       | Que.sp  | 0      | 0      | 3       | 0       | 5       | 0      | 0      | 1      | 0        | 0      | 0       | 0       |
| Insects       | Rhi.sp  | 3      | 0      | 0       | 0       | 10      | 0      | 0      | 0      | 0        | 2      | 0       | 1       |
| Insects       | Sep.lit | 0      | 0      | 0       | 0       | 2       | 0      | 0      | 0      | 0        | 0      | 0       | 0       |
| Insects       | Try.dom | 0      | 0      | 0       | 0       | 0       | 0      | 0      | 0      | 0        | 0      | 0       | 0       |
| Insects       | Xyl.lae | 0      | 0      | 0       | 0       | 3       | 1      | 0      | 0      | 0        | 0      | 0       | 0       |

| Species/genus |         | Fungi   | Fungi   | Fungi   | Fungi    | Fungi    | Fungi  | Fungi   | Fungi  | Fungi  | Fungi  | Fungi   | Fungi   |
|---------------|---------|---------|---------|---------|----------|----------|--------|---------|--------|--------|--------|---------|---------|
| Abbreviations |         | Neo.pun | Par.put | Pez.mel | Phac.lac | Phae.gae | Pod.sp | Pod.cla | Pol.sp | Pow.sp | Pro.sp | Pse.fra | The.ara |
| Insects       | Acr.inf | 0       | 0       | 0       | 0        | 0        | 1      | 1       | 1      | 0      | 3      | 1       | 1       |
| Insects       | Aga.nig | 0       | 1       | 0       | 0        | 0        | 0      | 0       | 1      | 0      | 2      | 0       | 1       |
| Insects       | Aga.sp  | 0       | 0       | 0       | 0        | 0        | 1      | 1       | 0      | 0      | 1      | 0       | 0       |
| Insects       | Ani.hum | 0       | 0       | 0       | 0        | 0        | 0      | 0       | 0      | 0      | 1      | 0       | 0       |
| Insects       | Anb.sp  | 0       | 0       | 0       | 0        | 0        | 1      | 1       | 1      | 0      | 2      | 0       | 0       |
| Insects       | Ant.sp  | 0       | 0       | 0       | 0        | 1        | 0      | 0       | 1      | 1      | 3      | 2       | 0       |
| Insects       | Cis.bol | 0       | 0       | 0       | 0        | 0        | 0      | 0       | 0      | 0      | 0      | 0       | 0       |
| Insects       | End.coc | 1       | 0       | 1       | 2        | 0        | 0      | 0       | 0      | 2      | 1      | 4       | 0       |
| Insects       | Epu.sp  | 0       | 0       | 0       | 0        | 0        | 0      | 0       | 0      | 1      | 0      | 1       | 0       |
| Insects       | Gli.hor | 1       | 0       | 0       | 5        | 0        | 0      | 0       | 2      | 6      | 15     | 7       | 1       |
| Insects       | Gli.qua | 2       | 0       | 0       | 7        | 1        | 0      | 0       | 1      | 3      | 2      | 3       | 1       |
| Insects       | Oxy.alt | 0       | 0       | 0       | 0        | 1        | 0      | 0       | 0      | 0      | 1      | 0       | 0       |
| Insects       | Que.sp  | 0       | 0       | 0       | 0        | 0        | 0      | 0       | 1      | 0      | 1      | 3       | 0       |
| Insects       | Rhi.sp  | 0       | 0       | 0       | 2        | 0        | 0      | 1       | 0      | 2      | 2      | 1       | 0       |
| Insects       | Sep.lit | 0       | 0       | 0       | 0        | 0        | 0      | 0       | 0      | 0      | 0      | 0       | 0       |
| Insects       | Try.dom | 0       | 0       | 0       | 1        | 0        | 0      | 0       | 0      | 0      | 0      | 0       | 0       |
| Insects       | Xyl.lae | 0       | 0       | 0       | 0        | 0        | 0      | 0       | 1      | 0      | 3      | 2       | 2       |

| Species/genus | Fungi    | Fungi     | Fungi  | Fungi   | Fungi  | Fungi    | Fungi  | Fungi   | Fungi  | Fungi   | Fungi   | Fungi  |
|---------------|----------|-----------|--------|---------|--------|----------|--------|---------|--------|---------|---------|--------|
| Abbreviation  | Rami.pin | Ramu.stel | Rhi.sp | Rhi.kal | Scl.sp | Myc.gros | Sep.sp | Sep.tan | Sir.sp | Spi.pse | Spo.bac | Sta.sp |
| Insects       | Acr.inf  | 0         | 0      | 0       | 1      | 0        | 0      | 0       | 0      | 0       | 0       | 0      |
| Insects       | Aga.nig  | 0         | 0      | 1       | 1      | 1        | 0      | 0       | 0      | 1       | 0       | 0      |
| Insects       | Aga.sp   | 0         | 0      | 1       | 0      | 0        | 1      | 0       | 0      | 0       | 0       | 0      |
| Insects       | Ani.hum  | 0         | 0      | 0       | 0      | 0        | 0      | 0       | 0      | 0       | 1       | 0      |
| Insects       | Anb.sp   | 0         | 0      | 2       | 2      | 0        | 1      | 0       | 0      | 0       | 1       | 0      |
| Insects       | Ant.sp   | 0         | 1      | 1       | 4      | 1        | 2      | 0       | 0      | 0       | 1       | 0      |
| Insects       | Cis.bol  | 0         | 0      | 0       | 0      | 0        | 0      | 0       | 0      | 0       | 0       | 0      |
| Insects       | End.coc  | 0         | 1      | 3       | 5      | 1        | 1      | 0       | 1      | 0       | 0       | 2      |
| Insects       | Epu.sp   | 0         | 0      | 0       | 2      | 0        | 0      | 0       | 0      | 0       | 0       | 1      |
| Insects       | Gli.hor  | 0         | 4      | 35      | 15     | 13       | 0      | 0       | 0      | 1       | 7       | 0      |
| Insects       | Gli.qua  | 0         | 2      | 26      | 9      | 7        | 1      | 0       | 0      | 0       | 4       | 0      |
| Insects       | Oxy.alt  | 0         | 0      | 0       | 0      | 0        | 0      | 0       | 0      | 1       | 0       | 0      |
| Insects       | Que.sp   | 0         | 2      | 3       | 1      | 1        | 0      | 0       | 0      | 0       | 1       | 0      |
| Insects       | Rhi.sp   | 0         | 1      | 12      | 3      | 2        | 0      | 0       | 0      | 0       | 2       | 0      |
| Insects       | Sep.lit  | 0         | 0      | 2       | 0      | 0        | 0      | 1       | 0      | 0       | 0       | 0      |
| Insects       | Try.dom  | 0         | 0      | 0       | 0      | 0        | 0      | 0       | 0      | 0       | 0       | 0      |
| Insects       | Xyl.lae  | 1         | 3      | 0       | 3      | 0        | 0      | 0       | 0      | 1       | 0       | 0      |

| Species/genus |         | Fungi   | Fungi  | Fungi    | Fungi |
|---------------|---------|---------|--------|----------|-------|
| Abbreviation  | Try.pin | Ven.ina | Ver.sp | Lept.lep |       |
| Insects       | Acr.inf | 0       | 0      | 0        | 0     |
| Insects       | Aga.nig | 1       | 0      | 0        | 0     |
| Insects       | Aga.sp  | 0       | 0      | 0        | 0     |
| Insects       | Ani.hum | 0       | 0      | 0        | 0     |
| Insects       | Anb.sp  | 0       | 0      | 0        | 0     |
| Insects       | Ant.sp  | 0       | 0      | 0        | 4     |
| Insects       | Cis.bol | 0       | 0      | 0        | 0     |
| Insects       | End.coc | 0       | 0      | 3        | 2     |
| Insects       | Epu.sp  | 0       | 0      | 0        | 1     |
| Insects       | Gli.hor | 3       | 3      | 0        | 7     |
| Insects       | Gli.qua | 4       | 0      | 0        | 0     |
| Insects       | Oxy.alt | 0       | 1      | 0        | 0     |
| Insects       | Que.sp  | 0       | 0      | 0        | 4     |
| Insects       | Rhi.sp  | 1       | 0      | 0        | 0     |
| Insects       | Sep.lit | 0       | 0      | 0        | 0     |
| Insects       | Try.dom | 0       | 0      | 0        | 0     |
| Insects       | Xyl.lae | 1       | 1      | 0        | 0     |
